# Supplementary material for: Screening Local Sicilian Tomato Ecotypes to Evaluate the Response of Tomato Brown Rugose Fruit Virus Infection
Source: MDPI journal article supplement (doi:10.3390/agronomy14030412), 2024-02-20
Supplement: s1 [file s1]

Archive with 3 entries (3 files):
- Supplementary Table S1.pdf
- Supplementary Table S2.pdf
- Supplementary Table S3.pdf
