# Supplementary material for: Screening Local Sicilian Tomato Ecotypes to Evaluate the Response of Tomato Brown Rugose Fruit Virus Infection
Source: MDPI journal article supplement (doi:10.3390/agronomy14030412), 2024-02-20
Supplement: s1 [file s1 › Supplementary Table S1.pdf]

**Supplementary Table S1** – Distribution of Sicilian tomato ecotypes based on plant and fruit traits measured using the phenotypic scale developed by IPGRI (1996).

| Traits                          | Class                     | N. of accessions | Frequency (%) |
|---------------------------------|---------------------------|------------------|---------------|
| Plant growth                    | Dwarf                     | 1                | 2.7           |
|                                 | Determinate               | 4                | 10.8          |
|                                 | Semi-determinate          | 15               | 40.5          |
|                                 | Indeterminate             | 17               | 45.9          |
| Leaf attitude                   | Semi-erect                | 6                | 16.2          |
|                                 | Horizontal                | 18               | 48.6          |
|                                 | Drooping                  | 13               | 35.1          |
| Leaf type                       | Dwarf                     | 0                | 0.0           |
|                                 | Potato leaf type          | 11               | 29.7          |
|                                 | Standard                  | 22               | 59.5          |
|                                 | <i>peruvianum</i>         | 4                | 10.8          |
|                                 | <i>pimpinellifolium</i>   | 0                | 0.0           |
|                                 | <i>hirsutum</i>           | 0                | 0.0           |
| Predominant fruit shape         | Flattened (oblate)        | 10               | 27.0          |
|                                 | Slightly flattened        | 4                | 10.8          |
|                                 | Rounded                   | 16               | 43.2          |
|                                 | High rounded              | 5                | 13.5          |
|                                 | Heart-shaped              | 1                | 2.7           |
|                                 | Cylindrical (long oblong) | 0                | 0.0           |
|                                 | Pyriform                  | 0                | 0.0           |
|                                 | Ellipsoid (plum-shape)    | 1                | 2.7           |
| Fruit size                      | Very small (<3 cm)        | 0                | 0.0           |
|                                 | Small (3-5 cm)            | 26               | 70.3          |
|                                 | Intermediate (5.1-8 cm)   | 5                | 13.5          |
|                                 | Large (8.1-10 cm)         | 6                | 16.2          |
|                                 | Very large (>10 cm)       | 0                | 0             |
| Fruit size homogeneity          | Low                       | 9                | 24.3          |
|                                 | Intermediate              | 10               | 27.0          |
|                                 | High                      | 18               | 48.6          |
| Exterior colour of mature fruit | Green                     | 0                | 0.0           |
|                                 | Orange                    | 3                | 8.1           |
|                                 | Red                       | 34               | 91.9          |
|                                 | Pink                      | 0                | 0.0           |
|                                 | Yellow                    | 0                | 0.0           |
| Intensity of exterior colour    | Light                     | 2                | 5.4           |
|                                 | Intermediate              | 16               | 43.2          |
|                                 | Dark                      | 19               | 51.4          |
| Flesh colour of pericarp        | Green                     | 0                | 0.0           |
|                                 | Orange                    | 4                | 10.8          |
|                                 | Red                       | 32               | 86.5          |
|                                 | Pink                      | 0                | 0.0           |
|                                 | Yellow                    | 1                | 2.7           |
| Flesh colour intensity          | Light                     | 9                | 24.3          |
|                                 | Intermediate              | 13               | 35.1          |
|                                 | Dark                      | 15               | 40.5          |
| Colour of core                  | Green                     | 0                | 0.0           |
|                                 | White                     | 0                | 0.0           |
|                                 | Light                     | 11               | 29.7          |
|                                 | Intermediate              | 21               | 56.8          |
|                                 | Dark                      | 5                | 13.5          |
| Fruit shoulder shape            | Flat                      | 15               | 40.5          |
|                                 | Slightly depressed        | 8                | 21.6          |
|                                 | Moderately depressed      | 8                | 21.6          |
|                                 | Strongly depressed        | 6                | 16.2          |
| Shape of pistil scar            | Dot                       | 24               | 64.9          |
|                                 | Stellate                  | 3                | 8.1           |
|                                 | Linear                    | 0                | 0.0           |
|                                 | Irregular                 | 10               | 27.0          |
| Blossom end shape               | Indented                  | 0                | 0.0           |
|                                 | Flat                      | 29               | 78.4          |
|                                 | Pointed                   | 8                | 21.6          |
| Cross sectional shape           | Round                     | 20               | 54.1          |
|                                 | Angular                   | 7                | 18.9          |

|                                              |              |    |      |
|----------------------------------------------|--------------|----|------|
|                                              | Irregular    | 10 | 27.0 |
|                                              | Absence      | 11 | 29.7 |
|                                              | Very weak    | 10 | 27.0 |
| Ribbing at calyx end                         | Weak         | 3  | 8.1  |
|                                              | Intermediate | 5  | 13.5 |
|                                              | Strong       | 8  | 21.6 |
|                                              | Easy         | 12 | 32.4 |
| Easiness of fruit to detach from the pedicel | Intermediate | 15 | 40.5 |
|                                              | Difficult    | 10 | 27.0 |
