# Supplementary material for: Screening Local Sicilian Tomato Ecotypes to Evaluate the Response of Tomato Brown Rugose Fruit Virus Infection
Source: MDPI journal article supplement (doi:10.3390/agronomy14030412), 2024-02-20
Supplement: s1 [file s1 › Supplementary Table S2.pdf]

**Supplementary Table S2 – Average symptom and Ct values/RNA copies number of Sicilian tomato ecotypes inoculated with ToBRFV.**

| Ecotype | Symptom severity index (dpi) |     |     |     | Leaf mosaic (dpi) |     |     |     | Leaf bubbling (dpi) |     |     |     | Leaf deformation (dpi) |     |     |     | Stunted growth (dpi) |     |     |     | Ct (dpi) | RNA copies (dpi)    |
|---------|------------------------------|-----|-----|-----|-------------------|-----|-----|-----|---------------------|-----|-----|-----|------------------------|-----|-----|-----|----------------------|-----|-----|-----|----------|---------------------|
|         | 7                            | 14  | 21  | 28  | 7                 | 14  | 21  | 28  | 7                   | 14  | 21  | 28  | 7                      | 14  | 21  | 28  | 7                    | 14  | 21  | 28  | 28       | 28                  |
|         |                              |     |     |     |                   |     |     |     |                     |     |     |     |                        |     |     |     |                      |     |     |     |          |                     |
| Pop1    | 0.8                          | 5.7 | 6.4 | 7.2 | 0.8               | 2.0 | 2.1 | 2.1 | 0.0                 | 2.7 | 3.0 | 3.0 | 0.0                    | 0.0 | 0.0 | 0.0 | 0.0                  | 0.0 | 0.0 | 0.0 | 20.6     | 1.7×10 <sup>5</sup> |
| Pop2    | 0.5                          | 3.4 | 5.3 | 6.3 | 0.5               | 1.4 | 2.7 | 3.0 | 0.0                 | 1.2 | 1.6 | 2.1 | 0.0                    | 0.0 | 0.0 | 0.0 | 0.0                  | 0.0 | 0.0 | 0.0 | 16.4     | 2.1×10 <sup>6</sup> |
| Pop3    | 1.0                          | 4   | 6.4 | 7.2 | 1.0               | 1.5 | 2.8 | 3.0 | 0.0                 | 1.0 | 1.8 | 2.2 | 0.0                    | 0.0 | 0.0 | 0.0 | 0.0                  | 0.0 | 0.0 | 0.0 | 23.0     | 4.2×10 <sup>4</sup> |
| Pop4    | 1.0                          | 4.8 | 7.7 | 8.9 | 1.0               | 2.0 | 2.8 | 3.0 | 0.0                 | 1.0 | 1.9 | 2.9 | 0.0                    | 0.0 | 0.0 | 0.0 | 0.0                  | 0.0 | 1.0 | 1.0 | 19.7     | 3.0×10 <sup>5</sup> |
| Pop5    | 1.0                          | 4.7 | 7.6 | 8   | 1.0               | 1.9 | 2.8 | 3.0 | 0.0                 | 1.8 | 2.8 | 2.9 | 0.0                    | 0.6 | 2.0 | 2.0 | 0.0                  | 0.0 | 0.0 | 0.0 | 23.8     | 2.6×10 <sup>4</sup> |
| Pop6    | 0.9                          | 3.2 | 7.3 | 8   | 0.9               | 1.0 | 2.6 | 3.0 | 0.0                 | 1.2 | 2.7 | 2.9 | 0.0                    | 0.8 | 1.0 | 1.2 | 0.0                  | 0.0 | 0.0 | 0.0 | 22.9     | 4.4×10 <sup>4</sup> |
| Pop7    | 0.2                          | 3.7 | 7.2 | 9.1 | 0.2               | 1.2 | 2.7 | 3.0 | 0.0                 | 0.9 | 1.8 | 2.9 | 0.0                    | 0.8 | 1.7 | 2.0 | 0.0                  | 0.8 | 1.0 | 1.1 | 23.0     | 4.2×10 <sup>4</sup> |
| Pop8    | 1.0                          | 3.9 | 7.9 | 9   | 1.0               | 1.0 | 2.4 | 3.0 | 0.0                 | 1.4 | 2.8 | 3.0 | 0.0                    | 0.9 | 2.0 | 2.0 | 0.0                  | 0.0 | 0.0 | 0.0 | 20.1     | 2.3×10 <sup>5</sup> |
| Pop9    | 0.7                          | 3.5 | 7.5 | 8.1 | 0.7               | 1.3 | 2.7 | 3.0 | 0.0                 | 1.2 | 2.8 | 3.0 | 0.0                    | 1.0 | 1.3 | 2.0 | 0.0                  | 0.0 | 0.0 | 0.0 | 22.7     | 5.0×10 <sup>4</sup> |
| Pop10   | 0.3                          | 3.4 | 5.8 | 7.9 | 0.3               | 1.4 | 2.4 | 3.0 | 0.0                 | 1.0 | 2.0 | 2.9 | 0.0                    | 1.0 | 1.4 | 2.0 | 0.0                  | 0.0 | 0.0 | 0.0 | 20.3     | 2.1×10 <sup>5</sup> |
| Pop11   | 0.9                          | 2.1 | 2.9 | 4.5 | 0.9               | 1.1 | 1.9 | 2.8 | 0.0                 | 1.0 | 1.0 | 1.7 | 0.0                    | 1.0 | 1.6 | 3.0 | 0.0                  | 0.0 | 0.0 | 0.0 | 23.2     | 3.7×10 <sup>4</sup> |
| Pop12   | 0                            | 5.4 | 7.6 | 8   | 0.0               | 2.7 | 3.0 | 3.0 | 0.0                 | 1.0 | 1.8 | 2.0 | 0.0                    | 1.0 | 2.0 | 2.0 | 0.0                  | 0.0 | 0.0 | 0.0 | 23.3     | 3.5×10 <sup>4</sup> |
| Pop13   | 2.4                          | 4.7 | 7.8 | 8.9 | 1.0               | 1.9 | 2.9 | 2.9 | 0.7                 | 1.6 | 2.3 | 3.0 | 0.0                    | 1.0 | 2.0 | 2.0 | 0.0                  | 0.0 | 0.0 | 0.0 | 23.3     | 3.5×10 <sup>4</sup> |
| Pop14   | 1.2                          | 4.9 | 8.4 | 9   | 0.7               | 1.9 | 2.7 | 3.0 | 0.3                 | 1.2 | 2.9 | 3.0 | 0.0                    | 1.0 | 2.0 | 2.0 | 0.0                  | 0.0 | 0.0 | 0.0 | 24.7     | 1.5×10 <sup>4</sup> |
| Pop15   | 0.8                          | 1   | 4.3 | 5   | 0.8               | 1.0 | 1.7 | 1.9 | 0.0                 | 0.0 | 1.7 | 2.1 | 0.0                    | 1.4 | 1.8 | 2.0 | 0.0                  | 0.0 | 0.9 | 1.0 | 22.0     | 7.6×10 <sup>4</sup> |
| Pop16   | 0                            | 2.9 | 7.5 | 7.8 | 0.0               | 1.0 | 2.8 | 2.9 | 0.0                 | 1.3 | 2.7 | 2.9 | 0.0                    | 1.4 | 2.7 | 3.0 | 0.0                  | 0.0 | 0.0 | 0.0 | 23.5     | 3.1×10 <sup>4</sup> |
| Pop17   | 0                            | 4.2 | 9.6 | 10  | 0.0               | 1.3 | 2.9 | 3.0 | 0.0                 | 1.1 | 2.9 | 3.0 | 0.0                    | 1.7 | 2.8 | 3.0 | 0.0                  | 0.0 | 1.0 | 1.0 | 24.4     | 1.8×10 <sup>4</sup> |
| Pop18   | 1.4                          | 5.7 | 8.8 | 9.9 | 0.0               | 1.1 | 2.1 | 2.9 | 0.3                 | 1.8 | 2.8 | 3.0 | 0.0                    | 1.8 | 2.0 | 2.0 | 0.8                  | 1.0 | 1.9 | 2.0 | 23.1     | 3.9×10 <sup>4</sup> |
| Pop19   | 1.0                          | 5.4 | 8.5 | 9   | 0.7               | 1.8 | 1.9 | 2.0 | 0.3                 | 1.8 | 2.8 | 3.0 | 0.0                    | 1.8 | 2.8 | 3.0 | 0.0                  | 0.9 | 1.8 | 2.0 | 21.0     | 1.4×10 <sup>5</sup> |
| Pop20   | 0                            | 3.2 | 7   | 9.1 | 0.0               | 1.2 | 2.9 | 3.0 | 0.0                 | 1.0 | 1.9 | 2.0 | 0.2                    | 1.8 | 2.8 | 3.0 | 0.0                  | 0.0 | 0.6 | 1.1 | 22.9     | 4.4×10 <sup>4</sup> |
| Pop21   | 0.7                          | 3.1 | 5.2 | 7.8 | 0.0               | 0.9 | 1.8 | 2.9 | 0.3                 | 0.8 | 1.2 | 1.9 | 0.2                    | 2.0 | 3.0 | 3.0 | 0.0                  | 0.5 | 1.2 | 2.0 | 21.1     | 1.3×10 <sup>5</sup> |
| Pop22   | 2.1                          | 4   | 5.1 | 6.5 | 0.8               | 1.6 | 1.9 | 2.0 | 0.7                 | 1.0 | 1.2 | 1.9 | 0.3                    | 1.7 | 1.9 | 3.0 | 0.0                  | 0.5 | 1.0 | 1.0 | 20.2     | 2.2×10 <sup>5</sup> |
| Pop23   | 3.5                          | 6.5 | 7.9 | 9   | 1.0               | 1.8 | 2.7 | 3.0 | 1.8                 | 2.9 | 3.0 | 3.0 | 0.3                    | 1.8 | 2.0 | 2.0 | 0.0                  | 0.0 | 0.0 | 0.0 | 19.6     | 3.1×10 <sup>5</sup> |
| Pop24   | 2.7                          | 3.8 | 5.7 | 6.1 | 0.9               | 1.0 | 1.0 | 1.0 | 0.9                 | 1.2 | 1.9 | 2.1 | 0.4                    | 0.9 | 1.0 | 1.0 | 0.0                  | 0.7 | 1.7 | 1.9 | 21.3     | 1.1×10 <sup>5</sup> |
| Pop25   | 2.8                          | 3.2 | 3.9 | 5.8 | 1.0               | 1.0 | 1.0 | 1.0 | 1.0                 | 1.0 | 1.0 | 1.0 | 0.6                    | 0.9 | 1.0 | 1.4 | 0.0                  | 0.0 | 0.0 | 0.9 | 20.9     | 1.4×10 <sup>5</sup> |
| Pop26   | 3.3                          | 4.7 | 7.3 | 8.7 | 1.7               | 2.0 | 2.7 | 2.9 | 0.9                 | 1.0 | 1.8 | 2.0 | 0.6                    | 1.9 | 2.0 | 2.0 | 0.0                  | 0.8 | 1.0 | 1.8 | 19.3     | 3.8×10 <sup>5</sup> |
| Pop27   | 0.5                          | 0.9 | 1   | 1   | 0.5               | 0.9 | 1.0 | 1.0 | 0.0                 | 0.0 | 0.0 | 0.0 | 0.6                    | 1.9 | 2.0 | 2.0 | 0.0                  | 0.0 | 0.0 | 0.0 | 19.0     | 4.5×10 <sup>5</sup> |
| Pop28   | 5.7                          | 7.8 | 9.2 | 10  | 1.8               | 2.1 | 3.0 | 3.0 | 1.9                 | 2.9 | 3.0 | 3.0 | 0.7                    | 0.9 | 1.8 | 2.0 | 0.0                  | 0.0 | 0.2 | 1.0 | 19.7     | 3.0×10 <sup>5</sup> |
| Pop29   | 2.8                          | 4.7 | 5.2 | 6.4 | 1.8               | 1.8 | 2.2 | 2.2 | 0.0                 | 1.0 | 1.0 | 2.2 | 0.7                    | 1.2 | 2.6 | 3.0 | 0.0                  | 0.0 | 0.0 | 0.0 | 22.8     | 4.7×10 <sup>4</sup> |
| Pop30   | 0.6                          | 2.7 | 3.9 | 6   | 0.2               | 0.2 | 1.0 | 1.0 | 0.1                 | 0.8 | 1.0 | 2.0 | 0.7                    | 1.8 | 2.2 | 3.0 | 0.0                  | 0.0 | 0.0 | 0.0 | 17.7     | 9.7×10 <sup>5</sup> |
| Pop31   | 2.6                          | 6.2 | 7.5 | 8.1 | 0.8               | 1.7 | 2.0 | 2.1 | 1.0                 | 2.7 | 3.0 | 3.0 | 0.8                    | 0.8 | 1.0 | 1.0 | 0.0                  | 0.0 | 0.0 | 0.0 | 15.1     | 4.5×10 <sup>6</sup> |
| Pop32   | 1.9                          | 2.5 | 3.5 | 3.5 | 0.2               | 0.2 | 1.0 | 1.0 | 0.9                 | 1.5 | 1.5 | 1.5 | 0.8                    | 1.2 | 1.9 | 2.9 | 0.0                  | 0.0 | 0.0 | 0.0 | 19.0     | 4.5×10 <sup>5</sup> |
| Pop33   | 2.5                          | 5.8 | 6.3 | 6.3 | 1.0               | 2.1 | 2.1 | 2.1 | 0.9                 | 1.8 | 2.2 | 2.2 | 0.8                    | 1.8 | 2.0 | 3.0 | 0.0                  | 0.0 | 0.0 | 0.0 | 15.9     | 2.8×10 <sup>6</sup> |
| Pop34   | 2.5                          | 5.8 | 6.3 | 6.3 | 1.0               | 2.1 | 2.1 | 2.1 | 0.9                 | 1.8 | 2.2 | 2.2 | 0.8                    | 1.8 | 2.5 | 3.0 | 0.0                  | 0.0 | 0.0 | 0.0 | 16.8     | 1.6×10 <sup>6</sup> |
| Pop35   | 1.0                          | 2.1 | 2.8 | 3   | 0.2               | 1.2 | 1.8 | 2.0 | 0.8                 | 0.9 | 1.0 | 1.0 | 0.9                    | 0.9 | 1.0 | 1.0 | 0.0                  | 0.0 | 0.0 | 0.0 | 18.2     | 7.2×10 <sup>5</sup> |
| Pop36   | 0.7                          | 6.5 | 7.5 | 8.8 | 0.3               | 2.7 | 2.7 | 3.0 | 0.2                 | 1.8 | 1.8 | 2.8 | 1.0                    | 1.9 | 2.0 | 2.0 | 0.0                  | 0.0 | 0.0 | 0.0 | 16.1     | 2.5×10 <sup>6</sup> |
| Pop37   | 2.5                          | 4.7 | 5.2 | 7.3 | 0.9               | 1.0 | 1.2 | 1.3 | 0.8                 | 1.9 | 2.0 | 3.0 | 2.0                    | 2.8 | 3.0 | 3.0 | 0.0                  | 0.0 | 0.0 | 0.0 | 17.8     | 9.2×10 <sup>5</sup> |

\*Evaluated at 7-, 14-, 21- and 28-days post-inoculation (dpi).

Color code for the intervals

| Symptom severity index | Leaf mosaic | Leaf bubbling | Leaf deformation | Stunted growth | Ct          | RNA copies number                          |
|------------------------|-------------|---------------|------------------|----------------|-------------|--------------------------------------------|
| 0.0                    | 0.0         | 0.0           | 0.0              | 0.0            | < 15.4      | > 3.8×10 <sup>6</sup>                      |
| 0.1 – 2.5              | 0.1 – 0.4   | 0.1 – 0.4     | 0.1 – 1.0        | 0.1 – 1.0      | 15.5 – 17.4 | 3.6×10 <sup>6</sup> – 1.1×10 <sup>6</sup>  |
| 2.6 – 5.5              | 0.5 – 1.4   | 0.5 – 1.4     | 1.1 – 1.5        | 1.1 – 1.5      | 17.5 – 19.4 | 1.09×10 <sup>6</sup> – 3.5×10 <sup>5</sup> |
| 5.6 – 8.5              | 1.5 – 2.4   | 1.5 – 2.4     | 1.6 – 2.0        | 1.6 – 2.0      | 19.5 – 21.6 | 3.3×10 <sup>5</sup> – 9.6×10 <sup>4</sup>  |
| 8.6 – 12.0             | 2.5 – 3.0   | 2.5 – 3.0     | 2.1 – 3.0        | 2.1 – 3.0      | 21.7 – 23.5 | 9.1×10 <sup>4</sup> – 3.1×10 <sup>4</sup>  |
|                        |             |               |                  |                | 23.6 – 25.5 | 2.9×10 <sup>4</sup> – 9.5×10 <sup>3</sup>  |

\* Leaf mosaic, bubbling and deformation, and stunted growth were evaluated as: 0, asymptomatic; 1, mild; 2, moderate or medium; and 3, severe for each plant. Symptom severity index is the addition of these symptoms.
