# Supplementary material for: Screening Local Sicilian Tomato Ecotypes to Evaluate the Response of Tomato Brown Rugose Fruit Virus Infection
Source: MDPI journal article supplement (doi:10.3390/agronomy14030412), 2024-02-20
Supplement: s1 [file s1 › Supplementary Table S3.pdf]

**Supplementary Table S3 – Morphological characterization of Sicilian tomato ecotypes (*Solanum lycopersicum* L.) according to the phenotypic scale developed by IPGRI (1996).**

|              | Plant growth     | Leaf attitude | Leaf type        | Predominant fruit shape | Fruit size   | Fruit size homogeneity | Exterior colour of mature fruit | Intensity of exterior colour | Flesh colour of pericarp | Flesh colour intensity | Colour of core | Fruit shoulder shape | Shape of pistil scar | Blossom end shape | Cross sectional shape | Ribbing at calyx end | Easiness of fruit to detach from the pedicel |
|--------------|------------------|---------------|------------------|-------------------------|--------------|------------------------|---------------------------------|------------------------------|--------------------------|------------------------|----------------|----------------------|----------------------|-------------------|-----------------------|----------------------|----------------------------------------------|
| <b>Pop1</b>  | Semi-determinate | Drooping      | Standard         | Rounded                 | Intermediate | Intermediate           | Red                             | Intermediate                 | Red                      | Intermediate           | Intermediate   | Slightly depressed   | Dot                  | Flat              | Round                 | Very weak            | Intermediate                                 |
| <b>Pop2</b>  | Semi-determinate | Horizontal    | Standard         | Slightly flattened      | Intermediate | Intermediate           | Red                             | Intermediate                 | Red                      | Dark                   | Intermediate   | Moderately depressed | Irregular            | Flat              | Irregular             | Intermediate         | Difficult                                    |
| <b>Pop3</b>  | Semi-determinate | Horizontal    | Standard         | Flattened               | Intermediate | Low                    | Red                             | Intermediate                 | Red                      | Intermediate           | Intermediate   | Moderately depressed | Irregular            | Flat              | Irregular             | Intermediate         | Difficult                                    |
| <b>Pop4</b>  | Determinate      | Drooping      | Potato leaf type | Rounded                 | Small        | Intermediate           | Red                             | Intermediate                 | Orange                   | Light                  | Intermediate   | Slightly depressed   | Stellate             | Flat              | Angular               | Very weak            | Easy                                         |
| <b>Pop5</b>  | Semi-determinate | Drooping      | Potato leaf type | Rounded                 | Small        | High                   | Orange                          | Dark                         | Orange                   | Dark                   | Intermediate   | Flat                 | Dot                  | Pointed           | Round                 | Absence              | Easy                                         |
| <b>Pop6</b>  | Dwarf            | Drooping      | Potato leaf type | Ellipsoid               | Small        | High                   | Red                             | Dark                         | Red                      | Dark                   | Intermediate   | Flat                 | Dot                  | Flat              | Round                 | Very weak            | Easy                                         |
| <b>Pop7</b>  | Semi-determinate | Horizontal    | Potato leaf type | Slightly flattened      | Small        | Intermediate           | Red                             | Intermediate                 | Red                      | Light                  | Light          | Moderately depressed | Dot                  | Flat              | Angular               | Intermediate         | Easy                                         |
| <b>Pop8</b>  | Indeterminate    | Drooping      | Peruvianum       | Rounded                 | Small        | High                   | Red                             | Intermediate                 | Red                      | Light                  | Intermediate   | Flat                 | Dot                  | Flat              | Round                 | Absence              | Intermediate                                 |
| <b>Pop9</b>  | Semi-determinate | Semi-erect    | Potato leaf type | Heart-shaped            | Small        | High                   | Red                             | Intermediate                 | Red                      | Intermediate           | Intermediate   | Flat                 | Dot                  | Pointed           | Round                 | Very weak            | Easy                                         |
| <b>Pop10</b> | Indeterminate    | Drooping      | Potato leaf type | High rounded            | Small        | Intermediate           | Red                             | Dark                         | Red                      | Intermediate           | Intermediate   | Slightly depressed   | Dot                  | Flat              | Angular               | Very weak            | Easy                                         |
| <b>Pop11</b> | Determinate      | Horizontal    | Potato leaf type | High rounded            | Small        | Low                    | Red                             | Dark                         | Red                      | Dark                   | Light          | Flat                 | Dot                  | Pointed           | Round                 | Absence              | Intermediate                                 |
| <b>Pop12</b> | Indeterminate    | Semi-erect    | Peruvianum       | Flattened               | Large        | Low                    | Red                             | Dark                         | Red                      | Dark                   | Intermediate   | Strongly depressed   | Irregular            | Flat              | Irregular             | Strong               | Difficult                                    |
| <b>Pop13</b> | Indeterminate    | Semi-erect    | Peruvianum       | Flattened               | Large        | Low                    | Red                             | Intermediate                 | Red                      | Intermediate           | Intermediate   | Strongly depressed   | Irregular            | Flat              | Irregular             | Strong               | Difficult                                    |
| <b>Pop14</b> | Indeterminate    | Horizontal    | Peruvianum       | Flattened               | Large        | Low                    | Red                             | Intermediate                 | Red                      | Light                  | Intermediate   | Strongly depressed   | Irregular            | Flat              | Irregular             | Strong               | Difficult                                    |
| <b>Pop15</b> | Indeterminate    | Horizontal    | Standard         | Rounded                 | Small        | High                   | Orange                          | Intermediate                 | Yellow                   | Dark                   | Light          | Flat                 | Dot                  | Flat              | Round                 | Very weak            | Easy                                         |
| <b>Pop16</b> | Semi-determinate | Horizontal    | Standard         | Flattened               | Small        | High                   | Red                             | Dark                         | Red                      | Dark                   | Intermediate   | Moderately depressed | Stellate             | Flat              | Angular               | Intermediate         | Intermediate                                 |
| <b>Pop17</b> | Indeterminate    | Drooping      | Standard         | Rounded                 | Small        | High                   | Red                             | Light                        | Red                      | Light                  | Light          | Flat                 | Dot                  | Flat              | Round                 | Absence              | Intermediate                                 |
| <b>Pop18</b> | Indeterminate    | Semi-erect    | Standard         | Rounded                 | Small        | High                   | Red                             | Intermediate                 | Red                      | Light                  | Light          | Flat                 | Dot                  | Flat              | Round                 | Absence              | Intermediate                                 |
| <b>Pop19</b> | Semi-determinate | Horizontal    | Standard         | Rounded                 | Small        | High                   | Red                             | Dark                         | Red                      | Dark                   | Dark           | Flat                 | Dot                  | Pointed           | Round                 | Absence              | Intermediate                                 |
| <b>Pop20</b> | Indeterminate    | Horizontal    | Standard         | Rounded                 | Small        | High                   | Red                             | Intermediate                 | Red                      | Intermediate           | Light          | Flat                 | Dot                  | Flat              | Round                 | Absence              | Intermediate                                 |
| <b>Pop21</b> | Semi-determinate | Horizontal    | Standard         | Rounded                 | Small        | High                   | Red                             | Dark                         | Red                      | Intermediate           | Intermediate   | Slightly depressed   | Dot                  | Flat              | Round                 | Very weak            | Intermediate                                 |
| <b>Pop22</b> | Indeterminate    | Drooping      | Standard         | Slightly flattened      | Small        | Intermediate           | Red                             | Dark                         | Red                      | Intermediate           | Intermediate   | Moderately depressed | Dot                  | Flat              | Round                 | Intermediate         | Intermediate                                 |
| <b>Pop23</b> | Indeterminate    | Horizontal    | Standard         | High rounded            | Small        | Intermediate           | Red                             | Intermediate                 | Red                      | Light                  | Light          | Slightly depressed   | Dot                  | Pointed           | Angular               | Weak                 | Easy                                         |
| <b>Pop24</b> | Semi-determinate | Horizontal    | Standard         | Rounded                 | Small        | Intermediate           | Red                             | Intermediate                 | Red                      | Intermediate           | Intermediate   | Flat                 | Dot                  | Flat              | Round                 | Absence              | Intermediate                                 |
| <b>Pop25</b> | Determinate      | Semi-erect    | Potato leaf type | Flattened               | Large        | Low                    | Red                             | Dark                         | Red                      | Dark                   | Dark           | Strongly depressed   | Irregular            | Flat              | Irregular             | Strong               | Difficult                                    |
| <b>Pop26</b> | Indeterminate    | Horizontal    | Standard         | Flattened               | Large        | Low                    | Red                             | Intermediate                 | Red                      | Intermediate           | Light          | Strongly depressed   | Irregular            | Flat              | Irregular             | Strong               | Difficult                                    |
| <b>Pop27</b> | Semi-determinate | Horizontal    | Standard         | Flattened               | Large        | Low                    | Red                             | Dark                         | Red                      | Dark                   | Intermediate   | Strongly depressed   | Irregular            | Flat              | Irregular             | Strong               | Difficult                                    |
| <b>Pop28</b> | Indeterminate    | Drooping      | Standard         | Rounded                 | Small        | High                   | Red                             | Dark                         | Red                      | Intermediate           | Intermediate   | Flat                 | Dot                  | Pointed           | Round                 | Absence              | Intermediate                                 |
| <b>Pop29</b> | Semi-determinate | Horizontal    | Standard         | Rounded                 | Small        | High                   | Red                             | Dark                         | Red                      | Dark                   | Intermediate   | Moderately depressed | Dot                  | Flat              | Angular               | Weak                 | Easy                                         |
| <b>Pop30</b> | Determinate      | Semi-erect    | Potato leaf type | Flattened               | Intermediate | Intermediate           | Red                             | Dark                         | Red                      | Dark                   | Dark           | Moderately depressed | Irregular            | Flat              | Irregular             | Strong               | Difficult                                    |
| <b>Pop31</b> | Indeterminate    | Drooping      | Standard         | Slightly flattened      | Small        | Intermediate           | Red                             | Dark                         | Red                      | Dark                   | Intermediate   | Slightly depressed   | Stellate             | Flat              | Round                 | Weak                 | Intermediate                                 |
| <b>Pop32</b> | Indeterminate    | Drooping      | Standard         | High rounded            | Small        | High                   | Red                             | Dark                         | Red                      | Dark                   | Dark           | Slightly depressed   | Dot                  | Pointed           | Angular               | Very weak            | Easy                                         |
| <b>Pop33</b> | Semi-determinate | Horizontal    | Standard         | Flattened               | Intermediate | Low                    | Red                             | Dark                         | Red                      | Intermediate           | Intermediate   | Moderately depressed | Irregular            | Flat              | Irregular             | Strong               | Difficult                                    |
| <b>Pop34</b> | Semi-determinate | Horizontal    | Potato leaf type | High rounded            | Small        | High                   | Red                             | Dark                         | Red                      | Dark                   | Dark           | Flat                 | Dot                  | Flat              | Round                 | Very weak            | Intermediate                                 |
| <b>Pop35</b> | Indeterminate    | Drooping      | Potato leaf type | Rounded                 | Small        | High                   | Orange                          | Intermediate                 | Orange                   | Light                  | Light          | Flat                 | Dot                  | Flat              | Round                 | Absence              | Easy                                         |
| <b>Pop36</b> | Semi-determinate | Horizontal    | Standard         | Rounded                 | Small        | High                   | Red                             | Light                        | Orange                   | Intermediate           | Light          | Slightly depressed   | Dot                  | Flat              | Round                 | Very weak            | Intermediate                                 |
| <b>Pop37</b> | Indeterminate    | Drooping      | Standard         | Rounded                 | Small        | High                   | Red                             | Dark                         | Red                      | Light                  | Light          | Flat                 | Dot                  | Pointed           | Round                 | Absence              | Easy                                         |
